# Supplementary material for: Progress in human ovarian rejuvenation: Current platelet-rich plasma and condensed cytokine research activity by scope and international origin
Source: PubMed Central journal article supplement — Clin Exp Reprod Med. 2021 Nov 23;48(4):311–5. doi: 10.5653/cerm.2021.04651 (PMC8651764; doi:10.5653/cerm.2021.04651), 2021-11-23
Supplement: cerm-2021-04651-suppl.pdf [file cerm-2021-04651-suppl.pdf]

**Supplementary Material 1.** Literature reviewed, April 2021

PubMed search: "ovarian"+"platelet rich plasma"

- Aflatoonian A, Lotfi M, Saeed L, Tabibnejad N. Effects of Intraovarian Injection of Autologous Platelet-Rich Plasma on Ovarian Rejuvenation in Poor Responders and Women with Primary Ovarian Insufficiency. *Reprod Sci* 2021 Mar 8. doi: 10.1007/s43032-021-00483-9. PMID: 33683669.
- Ahmadian S, Sheshpari S, Pazhang M, Bedate AM, Beheshti R, Abbasi MM, Nouri M, Rahbarghazi R, Mahdipour M. Intra-ovarian injection of platelet-rich plasma into ovarian tissue promoted rejuvenation in the rat model of premature ovarian insufficiency and restored ovulation rate via angiogenesis modulation. *Reprod Biol Endocrinol* 2020 Aug 5;18(1):78. doi: 10.1186/s12958-020-00638-4. PMID: 32758249.
- Bakacak M, Bostanci MS, İnanc F, Yaylali A, Serin S, Attar R, Yildirim G, Yildirim OK. Protective Effect of Platelet Rich Plasma on Experimental Ischemia/Reperfusion Injury in Rat Ovary. *Gynecol Obstet Invest* 2016;81(3):225-31. doi: 10.1159/000440617. PMID: 26496072.
- Bernardi M, Adami V, Albiero E, Madeo D, Rodeghiero F, Astori G. Absence of micronucleus formation in CHO-K1 cells cultivated in platelet lysate enriched medium. *Exp Toxicol Pathol* 2014 Mar;66(2-3):111-6. doi: 10.1016/j.etp.2013.11.001. PMID: 24290702.
- Cakiroglu Y, Saltik A, Yuceturk A, Karaosmanoglu O, Kopuk SY, Scott RT, Tiras B, Seli E. Effects of intraovarian injection of autologous platelet rich plasma on ovarian reserve and IVF outcome parameters in women with primary ovarian insufficiency. *Aging (Albany NY)* 2020 Jun 5;12(11):10211-10222. doi: 10.18632/aging.103403. PMID: 32507764.
- Cremonesi F, Bonfanti S, Idda A, Anna LC. Improvement of Embryo Recovery in Holstein Cows Treated by Intra-Ovarian Platelet Rich Plasma before Superovulation. *Vet Sci* 2020 Feb 1;7(1):16. doi: 10.3390/vetsci7010016. PMID: 32024142.
- Cremonesi F, Bonfanti S, Idda A, Lange-Consiglio A. Platelet Rich Plasma for Regenerative Medicine Treatment of Bovine Ovarian Hypofunction. *Front Vet Sci* 2020 Aug 13;7:517. doi: 10.3389/fvets.2020.00517. PMID: 32903508.
- Dehghani F, Aboutalebi H, Esmailpour T, Panjehshahin MR, Bordbar H. Effect of platelet-rich plasma (PRP) on ovarian structures in cyclophosphamide-induced ovarian failure in female rats: a stereological study. *Toxicol Mech Methods* 2018 Nov;28(9):653-659. doi: 10.1080/15376516.2018.1491662. Epub 2018 Oct 16. PMID: 29968488.
- El Bakly W, Medhat M, Shafei M, Tash R, Elrefai M, Shoukry Y, Omar NN. Optimized platelet rich plasma releasate (O-rPRP) repairs galactosemia-induced ovarian follicular loss in rats by activating mTOR signaling and inhibiting apoptosis. *Heliyon* 2020 Sep 21;6(9):e05006. doi: 10.1016/j.heliyon.2020.e05006. PMID: 33005806.
- Fabbrocini G, Cantelli M, Masarà A, Annunziata MC, Marasca C, Cacciapuoti S. Female pattern hair loss: A clinical, pathophysiologic, and therapeutic review. *Int J Womens Dermatol* 2018 Jun 19;4(4):203-211. doi: 10.1016/j.ijwd.2018.05.001. PMID: 30627618.
- Farimani M, Heshmati S, Poorolajal J, Bahmanzadeh M. A report on three live births in women with poor ovarian response following intra-ovarian injection of platelet-rich plasma (PRP). *Mol Biol Rep* 2019 Apr;46(2):1611-1616. doi: 10.1007/s11033-019-04609-w. PMID: 30725347.
- Fong Te Fong AC, Thavasu P, Gagrica S, Swales KE, Leach MO, Cosulich SC, Chung YL, Banerji U. Evaluation of the combination of the dual m-TORC1/2 inhibitor vistusertib (AZD2014) and paclitaxel in ovarian cancer models. *Oncotarget* 2017 Dec 6;8(69):113874-113884. doi: 10.18632/oncotarget.23022. PMID: 29371953.
- Giannelou P, Simopoulou M, Grigoriadis S, Makrakis E, Kontogeorgi A, Pantou A, Galatis D, Kalampokas T, Bakas P, Bolaris S, Pantos K, Sfakianoudis K. The Conundrum of Poor Ovarian Response: From Diagnosis to Treatment. *Diagnostics (Basel)* 2020 Sep 11;10(9):687. doi: 10.3390/diagnostics10090687. PMID: 32932955.
- Guicheney P, Marcel D. Decrease of platelet serotonin content in ovariectomized female rats. *Endocrinology* 1984 Jun;114(6):2412-4. doi: 10.1210/endo-114-6-2412. PMID: 6723587.
- Hajipour H, Farzadi L, Latifi Z, Keyhanvar N, Navali N, Fattahi A, Nouri M, Dittrich R. An update on platelet-rich plasma (PRP) therapy in endometrium and ovary related infertilities: clinical and molecular aspects. *Syst Biol Reprod Med* 2021 Feb 25:1-12. doi: 10.1080/19396368.2020.1862357. PMID: 33632047.
- Helmerhorst FM, van den Boogaard AM, Naaktgeboren N, Lequin RM.

- Is oxytocin present in platelets? *Gynecol Endocrinol* 1989 Sep;3(3):249-54. doi: 10.3109/09513598909152307. PMID: 2589108.
- Hosseini L, Shirazi A, Naderi MM, Shams-Esfandabadi N, Borjian Boroujeni S, Sarvari A, Sadeghnia S, Behzadi B, Akhondi MM. Platelet-rich plasma promotes the development of isolated human primordial and primary follicles to the preantral stage. *Reprod Biomed Online* 2017 Oct;35(4):343-350. doi: 10.1016/j.rbmo.2017.04.007. PMID: 28756131.
- Hsu CC, Hsu I, Hsu L, Chiu YJ, Dorjee S. Resumed ovarian function and pregnancy in early menopausal women by whole dimension subcortical ovarian administration of platelet-rich plasma and gonadotropins. *Menopause* 2021 Mar 29. doi: 10.1097/GME.0000000000001746. PMID: 33784262.
- Hsu CC, Hsu L, Hsu I, Chiu YJ, Dorjee S. Live Birth in Woman With Premature Ovarian Insufficiency Receiving Ovarian Administration of Platelet-Rich Plasma (PRP) in Combination With Gonadotropin: A Case Report. *Front Endocrinol (Lausanne)* 2020 Feb 19;11:50. doi: 10.3389/fendo.2020.00050. PMID: 32140135.
- Huang Q, Liu B, Jiang R, Liao S, Wei Z, Bi Y, Liu X, Deng R, Jin Y, Tan Y, Yang Y, Qin A. Corrigendum: G-CSF-mobilized peripheral blood mononuclear cells combined with platelet-rich plasma accelerate restoration of ovarian function in cyclophosphamide-induced POI rats. *Biol Reprod* 2020 Apr 24;102(5):1145. doi: 10.1093/biolre/iaaa031. PMID: 32175574.
- Huang Q, Liu B, Jiang R, Liao S, Wei Z, Bi Y, Liu X, Deng R, Jin Y, Tan Y, Yang Y, Qin A. G-CSF-mobilized peripheral blood mononuclear cells combined with platelet-rich plasma accelerate restoration of ovarian function in cyclophosphamide-induced POI rats. *Biol Reprod* 2019 Jul 1;101(1):91-101. doi: 10.1093/biolre/ioz077. PMID: 31034039.
- Massheimer V, Polini N, Alvarez C, Benozzi S, Selles J. 17Beta-estradiol rapid stimulation of rat aorta NOS activity is prevented by oestrogen deficiency. *Maturitas* 2002 Sep 30;43(1):55-64. doi: 10.1016/s0378-5122(02)00163-9. PMID: 12270583.
- Melo P, Navarro C, Jones C, Coward K, Coleman L. The use of autologous platelet-rich plasma (PRP) versus no intervention in women with low ovarian reserve undergoing fertility treatment: a non-randomized interventional study. *J Assist Reprod Genet* 2020 Apr;37(4):855-863. doi: 10.1007/s10815-020-01710-z. PMID: 32030554.
- Morrill GA, Kostellow AB, Osterlow K, Gupta RK. Differences in hydration state of nucleus and cytoplasm of the amphibian oocyte. *J Membr Biol* 1996 Sep;153(1):45-51. doi: 10.1007/s002329900108. PMID: 8694906.
- Moulavi F, Akram RT, Khorshid Sokhangouy S, Hosseini SM. Platelet rich plasma efficiently substitutes the beneficial effects of serum during in vitro oocyte maturation and helps maintain the mitochondrial activity of maturing oocytes. *Growth Factors* 2021 Mar 19:1-15. doi: 10.1080/08977194.2021.1900168. PMID: 33739231.
- Ozcan P, Takmaz T, Tok OE, Islek S, Yigit EN, Ficicioglu C. The protective effect of platelet-rich plasma administered on ovarian function in female rats with Cy-induced ovarian damage. *J Assist Reprod Genet*. 2020 Apr;37(4):865-873. doi: 10.1007/s10815-020-01689-7. PMID: 32020412.
- Panda SR, Sachan S, Hota S. A Systematic Review Evaluating the Efficacy of Intra-Ovarian Infusion of Autologous Platelet-Rich Plasma in Patients With Poor Ovarian Reserve or Ovarian Insufficiency. *Cureus* 2020 Dec 12;12(12):e12037. doi: 10.7759/cureus.12037. PMID: 33457137.
- Pantos K, Simopoulou M, Pantou A, Rapani A, Tsioulou P, Nitsos N, Syrkos S, Pappas A, Koutsilieris M, Sfakianoudis K. A Case Series on Natural Conceptions Resulting in Ongoing Pregnancies in Menopausal and Prematurely Menopausal Women Following Platelet-Rich Plasma Treatment. *Cell Transplant* 2019 Sep-Oct;28(9-10):1333-1340. doi: 10.1177/0963689719859539. PMID: 31271054.
- Park HS, Ulin M, Cetin E. Ovarian Rejuvenation Using Platelet-Rich Plasma: A Promising Option for Women in Early Menopause to Have a Baby. *Reprod Sci* 2020 Nov;27(11):1983-1984. doi: 10.1007/s43032-020-00315-2. PMID: 32935255.
- Petryk N, Petryk M. Ovarian Rejuvenation Through Platelet-Rich Autologous Plasma (PRP)-a Chance to Have a Baby Without Donor Eggs, Improving the Life Quality of Women Suffering from Early Menopause Without Synthetic Hormonal Treatment. *Reprod Sci* 2020 Nov;27(11):1975-1982. doi: 10.1007/s43032-020-00266-8. PMID: 32700285.
- Rocha MAC, Silva LMC, Oliveira WA, Bezerra DO, Silva GCD, Silva LDS, Medeiros BLDN, Baêta SAF, Carvalho MAM, Argôlo NM Neto. Allogeneic mesenchymal stem cells and xenogenic platelet rich plasma, associated or not, in the repair of bone failures in rabbits with secondary osteoporosis. *Acta Cir Bras* 2017 Sep;32(9):767-780. doi: 10.1590/s0102-865020170090000009. PMID: 29019594.

- Rosario R, Anderson RA. Novel approaches to fertility restoration in women with premature ovarian insufficiency. *Climacteric* 2021 Jan 11:1-13. doi: 10.1080/13697137.2020.1856806.
- Rousseau A, Larsen AK, Van Dreden P, Sabbah M, Elalamy I, Gerotzi-afas GT. Differential contribution of tissue factor and Factor XII to thrombin generation triggered by breast and pancreatic cancer cells. *Int J Oncol* 2017 Dec;51(6):1747-1756. doi: 10.3892/ijo.2017.4172. PMID: 29075790.
- Sarker D, Ang JE, Baird R, Kristeleit R, Shah K, Moreno V, Clarke PA, Raynaud FI, Levy G, Ware JA, Mazina K, Lin R, Wu J, Fredrickson J, Sporerke JM, Lackner MR, Yan Y, Friedman LS, Kaye SB, Derynck MK, Workman P, de Bono JS. First-in-human phase I study of pictilisib (GDC-0941), a potent pan-class I phosphatidylinositol-3-kinase (PI3K) inhibitor, in patients with advanced solid tumors. *Clin Cancer Res* 2015 Jan 1;21(1):77-86. doi: 10.1158/1078-0432.CCR-14-0947. PMID: 25370471.
- Seyyed Anvari S, Dehghan GH, Razi M. Preliminary Findings of Platelet-Rich Plasma-Induced Ameliorative Effect on Polycystic Ovarian Syndrome. *Cell J* 2019 Oct;21(3):243-252. doi: 10.22074/cellj.2019.5952. PMID: 31210429.
- Sfakianoudis K, Rapani A, Grigoriadis S, Retsina D, Maziotis E, Tsioulou P, Giannelou P, Pantos K, Koutsilieris M, Vlahos N, Mastorakos G, Simopoulou M. Novel Approaches in Addressing Ovarian Insufficiency in 2019: Are We There Yet? *Cell Transplant* 2020 Jan-Dec;29:963689720926154. doi: 10.1177/0963689720926154. PMID: 32686983.
- Sfakianoudis K, Simopoulou M, Grigoriadis S, Pantou A, Tsioulou P, Maziotis E, Rapani A, Giannelou P, Nitsos N, Kokkali G, Koutsilieris M, Pantos K. Reactivating Ovarian Function through Autologous Platelet-Rich Plasma Intraovarian Infusion: Pilot Data on Premature Ovarian Insufficiency, Perimenopausal, Menopausal, and Poor Responder Women. *J Clin Med* 2020 Jun 10;9(6):1809. doi: 10.3390/jcm9061809. PMID: 32532000.
- Sfakianoudis K, Simopoulou M, Nitsos N, Lazaros L, Rapani A, Pantou A, Koutsilieris M, Nikas Y, Pantos K. Successful Implantation and Live Birth Following Autologous Platelet-rich Plasma Treatment for a Patient with Recurrent Implantation Failure and Chronic Endometritis. *In Vivo* 2019 Mar-Apr;33(2):515-521. doi: 10.21873/invivo.11504. PMID: 30804135.
- Sfakianoudis K, Simopoulou M, Nitsos N, Rapani A, Pantou A, Vaxevanoglou T, Kokkali G, Koutsilieris M, Pantos K. A Case Series on Platelet-Rich Plasma Revolutionary Management of Poor Responder Patients. *Gynecol Obstet Invest* 2019;84(1):99-106. doi: 10.1159/000491697. Epub 2018 Aug 22. PMID: 30134239.
- Sfakianoudis K, Simopoulou M, Nitsos N, Rapani A, Pappas A, Pantou A, Chronopoulou M, Deligeoroglou E, Koutsilieris M, Pantos K. Autologous Platelet-Rich Plasma Treatment Enables Pregnancy for a Woman in Premature Menopause. *J Clin Med* 2018 Dec 20;8(1):1. doi: 10.3390/jcm8010001. PMID: 30577435.
- Sharara FI, Lelea LL, Rahman S, Klebanoff JS, Moawad GN. A narrative review of platelet-rich plasma (PRP) in reproductive medicine. *J Assist Reprod Genet* 2021 Mar 15. doi: 10.1007/s10815-021-02146-9. PMID: 33723748.
- Shojafar E, Mehranjani MS, Shariatzadeh SM. Utilizing platelet-rich fibrin bioscaffold at the graft site improves the structure and function of mice ovarian grafts. *Regen Med* 2019 May;14(5):409-422. doi: 10.2217/rme-2018-0050. PMID: 31187701.
- Sills ES, Li X, Rickers NS, Wood SH, Palermo GD. Metabolic and neuro-behavioral response following intraovarian administration of autologous activated platelet rich plasma: First qualitative data. *Neuroendocrinol Lett* 2019 Jan;39(6):427-433. PMID: 30796792.
- Sills ES, Rickers NS, Li X, Palermo GD. First data on in vitro fertilization and blastocyst formation after intraovarian injection of calcium gluconate-activated autologous platelet rich plasma. *Gynecol Endocrinol* 2018 Sep;34(9):756-760. doi: 10.1080/09513590.2018.1445219. PMID: 29486615.
- Sills ES, Rickers NS, Svid CS, Rickers JM, Wood SH. Normalized Ploidy Following 20 Consecutive Blastocysts with Chromosomal Error: Healthy 46, XY Pregnancy with IVF after Intraovarian Injection of Autologous Enriched Platelet-derived Growth Factors. *Int J Mol Cell Med* 2019 Winter;8(1):84-90. doi: 10.22088/IJMCM.BUMS.8.1.84. PMID: 32195207.
- Sills ES, Rickers NS, Wood SH. Intraovarian insertion of autologous platelet growth factors as cell-free concentrate: Fertility recovery and first unassisted conception with term delivery at age over 40. *Int J Reprod Biomed* 2020 Dec 21;18(12):1081-1086. doi: 10.18502/ijrm.v18i12.8030. PMID: 33426419.
- Sills ES, Wood SH. Autologous activated platelet-rich plasma injection into adult human ovary tissue: molecular mechanism, analysis, and

discussion of reproductive response. *Biosci Rep* 2019 Jun 4;39(6): BSR20190805. doi: 10.1042/BSR20190805. PMID: 31092698.

Stojkowska S, Dimitrov G, Stamenkovska N, Hadzi-Lega M, Petanovski Z. Live Birth Rates in Poor Responders' Group after Previous Treatment with Autologous Platelet-Rich Plasma and Low Dose Ovarian Stimulation Compared with Poor Responders Used Only Low Dose Ovarian Stimulation Before in Vitro Fertilization. *Open Access Maced J Med Sci* 2019 Sep 14;7(19):3184-3188. doi: 10.3889/oamjms.2019.825. PMID: 31949513.

Tandulwadkar S, Karthick MS. Combined Use of Autologous Bone Marrow-derived Stem Cells and Platelet-rich Plasma for Ovarian Rejuvenation in Poor Responders. *J Hum Reprod Sci* 2020 Jul-Sep;13(3): 184-190. doi: 10.4103/jhrs.JHRS\_130\_19. PMID: 33311903.

Urman B, Boza A, Balaban B. Platelet-rich plasma another add-on treatment getting out of hand? How can clinicians preserve the best interest of their patients? *Hum Reprod* 2019 Nov 1;34(11):2099-2103. doi: 10.1093/humrep/dez190. PMID: 31725883.

Vural B, Duruksu G, Vural F, Gorguc M, Karaoz E. Effects of VEGF (+) Mesenchymal Stem Cells and Platelet-Rich Plasma on Inbred Rat Ovarian Functions in Cyclophosphamide-Induced Premature Ovarian Insufficiency Model. *Stem Cell Rev Rep* 2019 Aug;15(4):558-573. doi:

10.1007/s12015-019-09892-5. PMID: 31037585.

Wood SH, Sills ES. Intraovarian vascular enhancement via stromal injection of platelet-derived growth factors: Exploring subsequent oocyte chromosomal status and in vitro fertilization outcomes. *Clin Exp Reprod Med*. 2020 Jun;47(2):94-100. doi: 10.5653/cerm.2019.03405. PMID: 32466629.

Xing Y, Lin NU, Maurer MA, Chen H, Mahvash A, Sahin A, Akcakanat A, Li Y, Abramson V, Litton J, Chavez-MacGregor M, Valero V, Piha-Paul SA, Hong D, Do KA, Tarco E, Riall D, Eterovic AK, Wulf GM, Cantley LC, Mills GB, Doyle LA, Winer E, Hortobagyi GN, Gonzalez-Angulo AM, Meric-Bernstam F. Phase II trial of AKT inhibitor MK-2206 in patients with advanced breast cancer who have tumors with PIK3CA or AKT mutations, and/or PTEN loss/PTEN mutation. *Breast Cancer Res* 2019 Jul 5;21(1):78. doi: 10.1186/s13058-019-1154-8. PMID: 31277699.

Yap TA, Yan L, Patnaik A, Tunariu N, Biondo A, Fearen I, Papadopoulos KP, Olmos D, Baird R, Delgado L, Tetteh E, Beckman RA, Lupinacci L, Riisnaes R, Decordova S, Heaton SP, Swales K, deSouza NM, Leach MO, Garrett MD, Sullivan DM, de Bono JS, Tolcher AW. Interrogating two schedules of the AKT inhibitor MK-2206 in patients with advanced solid tumors incorporating novel pharmacodynamic and functional imaging biomarkers. *Clin Cancer Res* 2014 Nov 15;20(22):5672-85. doi: 10.1158/1078-0432.CCR-14-0868. PMID: 25239610.
